# Supplementary material for: Learning virulent proteins from integrated query networks
Source: PubMed Central journal article supplement (PMC3560104; doi:10.1186/1471-2105-13-321), 2012-12-02
Supplement: 1471-2105-13-321-S3.pdf [file 1471-2105-13-321-S3.pdf]

# Learning pathogenic proteins from integrated query networks: Supplemental Tables

Eithon Cadag      Peter Tarczy-Hornoch      Peter J. Myler

Tables 1 to 11 contain the statistical significance tests for the six five-fold cross-validations of the integrated data sources against the baseline, according to the results of paired  $t$ -tests. Each cell contains a Bonferroni-adjusted  $p$ -value if the source or method describing the row statistically outperforms the source or method on the column, a (+) if the source along the row is not statistically better than the source or method along the column and a (-) if the source or method along the row is the same or worse (statistically or otherwise). Significance for these comparisons was set at  $\alpha = 0.05$ .

For these tables, the sources are listed as BioCyc (BCyc), CDD, GenNav (GN), AmiGO (AG), InterPro (IPro), KEGG, TIGRFAM (TFAM), PDB, BLAST with  $k$ NN (kNNB), 3mers frequencies and BLAST with SVM (BSVM).

|      | BCyc     | CDD      | GN | AG | IPro     | KEGG     | TFAM     | PDB      | kNNB     | 3mer     | BSVM     |
|------|----------|----------|----|----|----------|----------|----------|----------|----------|----------|----------|
| BioC | -        | -        | -  | -  | -        | -        | 6.06e-05 | -        | -        | -        | -        |
| CDD  | 1.86e-04 | -        | -  | -  | -        | +        | 1.13e-10 | 9.68e-05 | -        | -        | -        |
| GN   | 0.00e+00 | 0.00e+00 | -  | +  | 5.85e-04 | 0.00e+00 | 0.00e+00 | 0.00e+00 | 4.13e-11 | 1.60e-08 | 0.00e+00 |
| AG   | 0.00e+00 | 0.00e+00 | -  | -  | 5.51e-03 | 0.00e+00 | 0.00e+00 | 0.00e+00 | 8.16e-10 | 1.02e-06 | 0.00e+00 |
| IPro | 0.00e+00 | 0.00e+00 | -  | -  | -        | 0.00e+00 | 0.00e+00 | 0.00e+00 | 3.76e-05 | 4.99e-04 | 3.44e-12 |
| KEGG | +        | -        | -  | -  | -        | -        | 3.90e-08 | +        | -        | -        | -        |
| TFAM | -        | -        | -  | -  | -        | -        | -        | -        | -        | -        | -        |
| PDB  | +        | -        | -  | -  | -        | -        | 3.17e-05 | -        | -        | -        | -        |
| kNNB | 5.15e-11 | 5.96e-08 | -  | -  | -        | 4.18e-10 | 3.41e-11 | 3.48e-09 | -        | -        | 1.39e-02 |
| 3mer | 7.45e-13 | 4.56e-11 | -  | -  | -        | 8.55e-13 | 0.00e+00 | 3.66e-13 | +        | -        | 7.07e-08 |
| BSVM | 4.47e-07 | 4.87e-03 | -  | -  | -        | 2.11e-05 | 2.44e-14 | 1.07e-05 | -        | -        | -        |

Table 1: ROC p-values for the Adherence virulent class.

|      | BCyc     | CDD      | GN | AG | IPro     | KEGG     | TFAM     | PDB      | kNNB     | 3mer | BSVM     |
|------|----------|----------|----|----|----------|----------|----------|----------|----------|------|----------|
| BioC | -        | -        | -  | -  | -        | -        | -        | -        | -        | -    | -        |
| CDD  | 1.13e-09 | -        | -  | -  | -        | 4.05e-04 | 3.20e-08 | 3.23e-04 | -        | -    | -        |
| GN   | 0.00e+00 | 4.94e-10 | -  | +  | 2.62e-07 | 1.22e-14 | 0.00e+00 | 3.43e-12 | 1.31e-04 | -    | 6.94e-04 |
| AG   | 0.00e+00 | 1.57e-09 | -  | -  | 4.28e-06 | 1.22e-14 | 0.00e+00 | 5.78e-12 | 2.41e-05 | -    | 3.02e-03 |
| IPro | 3.91e-13 | 3.14e-03 | -  | -  | -        | 1.52e-07 | 7.36e-12 | 1.14e-05 | +        | -    | -        |
| KEGG | 3.26e-02 | -        | -  | -  | -        | -        | +        | -        | -        | -    | -        |
| TFAM | +        | -        | -  | -  | -        | -        | -        | -        | -        | -    | -        |
| PDB  | 1.93e-05 | -        | -  | -  | -        | +        | 3.54e-03 | -        | -        | -    | -        |
| kNNB | 2.57e-07 | +        | -  | -  | -        | 5.67e-05 | 2.94e-05 | +        | -        | -    | -        |
| 3mer | 0.00e+00 | 3.60e-11 | +  | +  | 1.77e-07 | 0.00e+00 | 0.00e+00 | 4.27e-13 | 1.12e-05 | -    | 3.03e-05 |
| BSVM | 1.44e-10 | 7.06e-03 | -  | -  | +        | 9.75e-08 | 3.15e-09 | 6.91e-05 | +        | -    | -        |

Table 2: ROC p-values for the Surface factor virulent class.

|      | BCyc     | CDD      | GN | AG       | IPro     | KEGG     | TFAM     | PDB      | kNNB     | 3mer     | BSVM     |
|------|----------|----------|----|----------|----------|----------|----------|----------|----------|----------|----------|
| BioC | -        | -        | -  | -        | -        | -        | -        | -        | -        | -        | -        |
| CDD  | 4.53e-06 | -        | -  | -        | -        | -        | 4.11e-06 | 1.50e-02 | -        | -        | 6.24e-03 |
| GN   | 0.00e+00 | 8.06e-13 | -  | 3.73e-06 | 6.25e-09 | 1.22e-14 | 0.00e+00 | 0.00e+00 | 1.41e-11 | 1.16e-09 | 0.00e+00 |
| AG   | 3.05e-13 | 2.41e-10 | -  | -        | 4.66e-05 | 2.69e-09 | 1.22e-14 | 8.55e-14 | 8.43e-09 | 4.25e-07 | 2.93e-13 |
| IPro | 2.73e-11 | 1.83e-05 | -  | -        | -        | +        | 1.95e-12 | 1.24e-08 | +        | +        | 1.28e-09 |
| KEGG | 7.80e-07 | +        | -  | -        | -        | -        | 2.47e-07 | 9.78e-04 | +        | +        | 1.47e-06 |
| TFAM | +        | -        | -  | -        | -        | -        | -        | -        | -        | -        | -        |
| PDB  | +        | -        | -  | -        | -        | -        | +        | -        | -        | -        | +        |
| kNNB | 6.40e-06 | +        | -  | -        | -        | -        | 1.11e-05 | 1.94e-04 | -        | +        | 4.25e-04 |
| 3mer | 2.58e-04 | +        | -  | -        | -        | -        | 2.40e-05 | 4.82e-03 | -        | -        | 5.64e-08 |
| BSVM | +        | -        | -  | -        | -        | -        | +        | -        | -        | -        | -        |

Table 3: ROC p-values for the Invasion virulent class.

|      | BCyc     | CDD      | GN | AG       | IPro     | KEGG     | TFAM     | PDB      | kNNB     | 3mer     | BSVM     |
|------|----------|----------|----|----------|----------|----------|----------|----------|----------|----------|----------|
| BioC | -        | -        | -  | -        | -        | -        | 7.53e-08 | -        | -        | 3.54e-04 | 3.10e-03 |
| CDD  | 6.11e-13 | -        | -  | -        | +        | 6.70e-07 | 1.22e-14 | 4.55e-03 | +        | 5.88e-11 | 3.09e-10 |
| GN   | 0.00e+00 | 8.10e-08 | -  | 7.16e-05 | 7.90e-08 | 1.22e-14 | 0.00e+00 | 2.55e-10 | 4.34e-06 | 0.00e+00 | 0.00e+00 |
| AG   | 1.28e-12 | 4.51e-04 | -  | -        | 2.41e-04 | 4.36e-12 | 0.00e+00 | 4.49e-08 | 2.67e-03 | 0.00e+00 | 0.00e+00 |
| IPro | 8.08e-08 | -        | -  | -        | -        | 1.06e-06 | 0.00e+00 | +        | +        | 9.51e-12 | 6.01e-10 |
| KEGG | +        | -        | -  | -        | -        | -        | 1.16e-07 | -        | -        | 9.14e-08 | 9.24e-05 |
| TFAM | -        | -        | -  | -        | -        | -        | -        | -        | -        | -        | -        |
| PDB  | 4.07e-05 | -        | -  | -        | -        | 1.70e-02 | 1.18e-11 | -        | -        | 4.65e-08 | 2.65e-07 |
| kNNB | 6.72e-04 | -        | -  | -        | -        | 3.86e-05 | 1.01e-09 | +        | +        | 3.04e-11 | 8.20e-10 |
| 3mer | -        | -        | -  | -        | -        | -        | +        | -        | -        | -        | -        |
| BSVM | -        | -        | -  | -        | -        | -        | +        | -        | -        | +        | -        |

Table 4: ROC p-values for the Transport and uptake virulent class.

|      | BCyc     | CDD      | GN | AG       | IPro     | KEGG     | TFAM     | PDB      | kNNB     | 3mer     | BSVM     |
|------|----------|----------|----|----------|----------|----------|----------|----------|----------|----------|----------|
| BioC | -        | -        | -  | -        | -        | -        | 9.20e-04 | -        | -        | -        | +        |
| CDD  | 2.61e-06 | -        | -  | -        | -        | +        | 1.95e-13 | +        | +        | 6.55e-03 | 3.16e-05 |
| GN   | 0.00e+00 | 6.11e-14 | -  | 1.10e-02 | 8.04e-04 | 0.00e+00 | 0.00e+00 | 1.34e-13 | 1.22e-14 | 0.00e+00 | 0.00e+00 |
| AG   | 0.00e+00 | 4.52e-13 | -  | -        | 4.35e-02 | 0.00e+00 | 0.00e+00 | 4.15e-13 | 0.00e+00 | 0.00e+00 | 0.00e+00 |
| IPro | 1.22e-14 | 2.30e-11 | -  | -        | -        | 2.30e-12 | 0.00e+00 | 1.45e-10 | 9.67e-11 | 4.27e-13 | 1.22e-13 |
| KEGG | 4.00e-03 | -        | -  | -        | -        | -        | 2.52e-10 | -        | +        | +        | 6.69e-04 |
| TFAM | -        | -        | -  | -        | -        | -        | -        | -        | -        | -        | -        |
| PDB  | 3.59e-04 | -        | -  | -        | -        | +        | 4.45e-10 | -        | +        | 2.48e-02 | 5.48e-05 |
| kNNB | +        | -        | -  | -        | -        | -        | 1.41e-03 | -        | -        | +        | 8.94e-04 |
| 3mer | +        | -        | -  | -        | -        | -        | 2.84e-02 | -        | -        | -        | +        |
| BSVM | -        | -        | -  | -        | -        | -        | +        | -        | -        | -        | -        |

Table 5: ROC p-values for the Toxin virulent class.

|      | BCyc     | CDD      | GN | AG | IPro     | KEGG     | TFAM     | PDB      | kNNB     | 3mer     | BSVM     |
|------|----------|----------|----|----|----------|----------|----------|----------|----------|----------|----------|
| BioC | -        | -        | -  | -  | -        | -        | -        | -        | -        | -        | -        |
| CDD  | 0.00e+00 | -        | -  | -  | -        | 7.62e-08 | 9.77e-14 | -        | -        | -        | -        |
| GN   | 0.00e+00 | 8.94e-12 | -  | +  | 2.40e-04 | 0.00e+00 | 0.00e+00 | 1.44e-11 | 1.44e-04 | 3.59e-06 | 3.88e-08 |
| AG   | 0.00e+00 | 1.01e-11 | -  | -  | 6.74e-04 | 0.00e+00 | 0.00e+00 | 2.62e-11 | 4.48e-04 | 3.47e-07 | 1.61e-07 |
| IPro | 0.00e+00 | 3.23e-10 | -  | -  | -        | 0.00e+00 | 0.00e+00 | 3.98e-09 | -        | +        | 9.23e-08 |
| KEGG | 1.92e-04 | -        | -  | -  | -        | -        | +        | -        | -        | -        | -        |
| TFAM | +        | -        | -  | -  | -        | -        | -        | -        | -        | -        | -        |
| PDB  | 3.66e-14 | +        | -  | -  | -        | 1.11e-09 | 9.40e-13 | -        | -        | -        | +        |
| kNNB | 0.00e+00 | 1.77e-04 | -  | -  | -        | 0.00e+00 | 0.00e+00 | 2.06e-02 | -        | -        | 1.26e-02 |
| 3mer | 0.00e+00 | 2.04e-06 | -  | -  | -        | 1.22e-14 | 1.22e-14 | 6.69e-04 | +        | -        | 1.91e-03 |
| BSVM | 8.43e-13 | +        | -  | -  | -        | 6.94e-07 | 9.18e-11 | -        | -        | -        | -        |

Table 6: ROC p-values for the Catalysis virulent class.

|      | BCyc     | CDD      | GN | AG       | IPro     | KEGG     | TFAM     | PDB      | kNNB     | 3mer     | BSVM     |
|------|----------|----------|----|----------|----------|----------|----------|----------|----------|----------|----------|
| BioC | -        | -        | -  | -        | -        | -        | -        | -        | -        | -        | +        |
| CDD  | 0.00e+00 | -        | -  | -        | -        | -        | 9.55e-08 | 1.22e-13 | -        | +        | 2.95e-11 |
| GN   | 0.00e+00 | 0.00e+00 | -  | 7.42e-07 | 4.53e-10 | 1.21e-11 | 0.00e+00 | 0.00e+00 | 0.00e+00 | 0.00e+00 | 0.00e+00 |
| AG   | 0.00e+00 | 0.00e+00 | -  | -        | 3.19e-04 | 7.02e-08 | 0.00e+00 | 0.00e+00 | 2.44e-14 | 0.00e+00 | 0.00e+00 |
| IPro | 0.00e+00 | 0.00e+00 | -  | -        | -        | 8.97e-04 | 0.00e+00 | 0.00e+00 | 1.72e-09 | 0.00e+00 | 0.00e+00 |
| KEGG | 0.00e+00 | 7.82e-13 | -  | -        | -        | -        | 0.00e+00 | 0.00e+00 | 2.77e-02 | 7.77e-11 | 0.00e+00 |
| TFAM | 3.56e-05 | -        | -  | -        | -        | -        | -        | +        | -        | -        | 2.39e-06 |
| PDB  | +        | -        | -  | -        | -        | -        | -        | -        | -        | -        | 1.13e-04 |
| kNNB | 1.73e-11 | 5.98e-04 | -  | -        | -        | -        | 2.97e-09 | 3.11e-10 | -        | 1.04e-05 | 0.00e+00 |
| 3mer | 3.10e-10 | -        | -  | -        | -        | -        | 2.96e-05 | 3.57e-07 | -        | -        | 7.69e-13 |
| BSVM | -        | -        | -  | -        | -        | -        | -        | -        | -        | -        | -        |

Table 7: ROC p-values for the Secretion virulent class.

|      | BCyc     | CDD      | GN | AG | IPro     | KEGG     | TFAM     | PDB      | kNNB     | 3mer     | BSVM     |
|------|----------|----------|----|----|----------|----------|----------|----------|----------|----------|----------|
| BioC | -        | -        | -  | -  | -        | -        | 1.03e-05 | 0.00e+00 | +        | 7.38e-10 | 9.24e-12 |
| CDD  | 8.03e-09 | -        | -  | -  | -        | -        | 1.87e-11 | 0.00e+00 | 1.59e-05 | 7.33e-14 | 1.22e-13 |
| GN   | 1.22e-14 | 8.61e-12 | -  | +  | 9.46e-09 | 6.40e-08 | 0.00e+00 | 0.00e+00 | 1.22e-12 | 0.00e+00 | 0.00e+00 |
| AG   | 9.77e-14 | 1.42e-10 | -  | -  | 3.96e-08 | 2.45e-07 | 0.00e+00 | 0.00e+00 | 1.49e-12 | 0.00e+00 | 0.00e+00 |
| IPro | 3.16e-09 | 3.86e-02 | -  | -  | -        | -        | 0.00e+00 | 0.00e+00 | 3.31e-07 | 0.00e+00 | 3.66e-14 |
| KEGG | 9.15e-07 | -        | -  | -  | +        | -        | 1.45e-11 | 0.00e+00 | 1.48e-07 | 0.00e+00 | 3.66e-14 |
| TFAM | -        | +        | -  | -  | -        | -        | -        | 5.52e-07 | -        | +        | 2.09e-05 |
| PDB  | -        | -        | -  | -  | -        | -        | -        | -        | -        | -        | +        |
| kNNB | -        | -        | -  | -  | -        | -        | +        | 2.41e-05 | -        | +        | 8.93e-05 |
| 3mer | -        | -        | -  | -  | -        | -        | -        | +        | -        | -        | 2.54e-02 |
| BSVM | -        | -        | -  | -  | -        | -        | -        | -        | -        | -        | -        |

Table 8: ROC p-values for the Motility virulent class.

|      | BCyc     | CDD      | GN       | AG       | IPro | KEGG     | TFAM     | PDB      | kNNB     | 3mer     | BSVM     |
|------|----------|----------|----------|----------|------|----------|----------|----------|----------|----------|----------|
| BioC | -        | -        | -        | +        | -    | 5.43e-11 | +        | +        | 7.75e-08 | 0.00e+00 | 0.00e+00 |
| CDD  | 8.02e-06 | -        | -        | 3.32e-05 | -    | 1.22e-14 | 4.77e-07 | 8.52e-11 | 3.64e-10 | 0.00e+00 | 0.00e+00 |
| GN   | 2.73e-08 | +        | -        | 1.47e-13 | -    | 0.00e+00 | 1.05e-08 | 1.41e-08 | 2.15e-12 | 0.00e+00 | 0.00e+00 |
| AG   | -        | -        | -        | -        | -    | 1.94e-07 | +        | +        | 3.42e-05 | 0.00e+00 | 0.00e+00 |
| IPro | 1.22e-14 | 1.08e-07 | 1.14e-04 | 8.55e-14 | -    | 0.00e+00 | 0.00e+00 | 1.59e-13 | 1.22e-14 | 0.00e+00 | 0.00e+00 |
| KEGG | -        | -        | -        | -        | -    | -        | -        | -        | +        | 3.89e-11 | 2.03e-12 |
| TFAM | -        | -        | -        | -        | -    | 9.24e-09 | -        | +        | 7.09e-06 | 0.00e+00 | 0.00e+00 |
| PDB  | -        | -        | -        | -        | -    | 4.27e-06 | -        | -        | 1.78e-04 | 4.15e-13 | 3.66e-14 |
| kNNB | -        | -        | -        | -        | -    | -        | -        | -        | -        | 5.92e-10 | 1.80e-09 |
| 3mer | -        | -        | -        | -        | -    | -        | -        | -        | -        | -        | 1.10e-02 |
| BSVM | -        | -        | -        | -        | -    | -        | -        | -        | -        | -        | -        |

Table 9: ROC p-values for the Antibiotic resistance virulent class.

|      | BCyc     | CDD      | GN | AG | IPro | KEGG     | TFAM     | PDB      | kNNB     | 3mer     | BSVM     |
|------|----------|----------|----|----|------|----------|----------|----------|----------|----------|----------|
| BioC | -        | -        | -  | -  | -    | -        | +        | -        | -        | -        | -        |
| CDD  | 2.06e-12 | -        | -  | -  | -    | +        | 4.73e-10 | 7.36e-11 | +        | +        | 9.29e-04 |
| GN   | 1.22e-14 | 7.18e-10 | -  | +  | +    | 3.26e-10 | 0.00e+00 | 0.00e+00 | 3.47e-09 | 1.22e-14 | 7.94e-13 |
| AG   | 1.22e-14 | 3.98e-10 | -  | -  | +    | 2.60e-10 | 0.00e+00 | 0.00e+00 | 1.04e-08 | 4.03e-13 | 9.77e-14 |
| IPro | 1.22e-14 | 1.31e-09 | -  | -  | -    | 5.23e-08 | 0.00e+00 | 0.00e+00 | 3.73e-07 | 4.13e-10 | 1.47e-11 |
| KEGG | 1.12e-05 | -        | -  | -  | -    | -        | 5.33e-11 | 2.16e-07 | +        | +        | 1.02e-03 |
| TFAM | -        | -        | -  | -  | -    | -        | -        | -        | -        | -        | -        |
| PDB  | +        | -        | -  | -  | -    | -        | +        | -        | -        | -        | -        |
| kNNB | 3.42e-02 | -        | -  | -  | -    | -        | 1.69e-03 | 2.50e-02 | -        | +        | +        |
| 3mer | 4.82e-02 | -        | -  | -  | -    | -        | 9.27e-05 | 1.87e-02 | -        | -        | +        |
| BSVM | +        | -        | -  | -  | -    | -        | +        | +        | -        | -        | -        |

Table 10: ROC p-values for the Defense virulent class.

|      | BCyc     | CDD      | GN | AG | IPro     | KEGG     | TFAM     | PDB      | kNNB     | 3mer     | BSVM     |
|------|----------|----------|----|----|----------|----------|----------|----------|----------|----------|----------|
| BioC | -        | -        | -  | -  | -        | +        | 3.26e-02 | 1.08e-02 | +        | -        | 8.04e-09 |
| CDD  | 5.25e-06 | -        | -  | -  | -        | 2.29e-05 | 2.02e-09 | 3.84e-11 | 1.73e-08 | 2.96e-05 | 0.00e+00 |
| GN   | 1.05e-12 | 9.44e-08 | -  | +  | 1.32e-05 | 2.08e-13 | 0.00e+00 | 0.00e+00 | 3.66e-14 | 1.28e-10 | 0.00e+00 |
| AG   | 5.21e-11 | 8.04e-07 | -  | -  | 4.37e-04 | 5.32e-11 | 4.88e-14 | 1.22e-14 | 2.44e-14 | 5.69e-10 | 0.00e+00 |
| IPro | 6.14e-09 | +        | -  | -  | -        | 2.18e-06 | 3.59e-11 | 1.95e-12 | 8.34e-10 | 1.10e-06 | 0.00e+00 |
| KEGG | -        | -        | -  | -  | -        | -        | +        | +        | +        | -        | 2.72e-07 |
| TFAM | -        | -        | -  | -  | -        | -        | -        | +        | +        | -        | 2.00e-06 |
| PDB  | -        | -        | -  | -  | -        | -        | -        | -        | -        | -        | 9.42e-07 |
| kNNB | -        | -        | -  | -  | -        | -        | -        | -        | +        | -        | 5.43e-05 |
| 3mer | +        | -        | -  | -  | -        | +        | +        | 2.73e-02 | 3.44e-02 | -        | 2.84e-10 |
| BSVM | -        | -        | -  | -  | -        | -        | -        | -        | -        | -        | -        |

Table 11: ROC p-values for the Other virulent class.
